# Supplementary material for: Estimation of the Near-Surface Ozone Concentration with Full Spatiotemporal Coverage across the Beijing-Tianjin-Hebei Region Based on Extreme Gradient Boosting Combined with a WRF-Chem Model
Source: MDPI journal article supplement (doi:10.3390/atmos13040632), 2022-04-15
Supplement: s1 [file s1]

Supplementary Materials

# Estimation of the Near-Surface Ozone Concentration With Full Spatiotemporal Coverage Across the Beijing-Tianjin-Hebei Region Based on Extreme Gradient Boosting Combined With Wrf-Chem Model

Xiaomin Hu <sup>1</sup>, Jing Zhang <sup>1,\*</sup>, Wenhao Xue <sup>2,\*</sup>, Lihua Zhou <sup>3</sup>, Yunfei Che <sup>1,4</sup> and Tian Han <sup>1</sup>

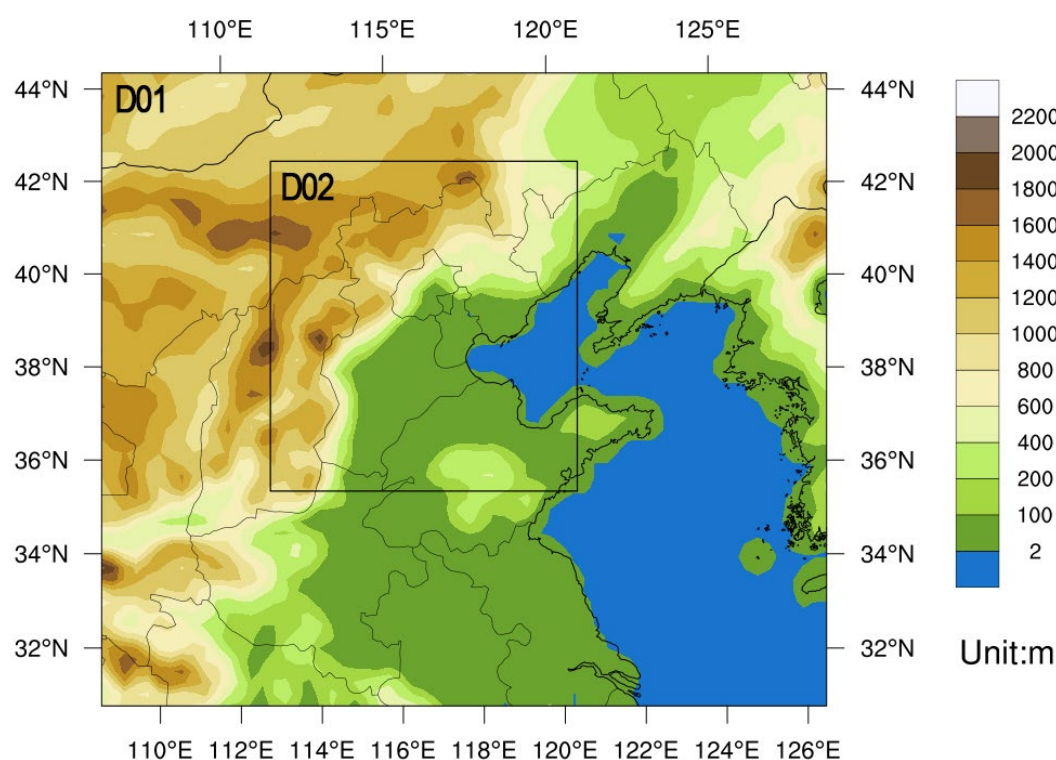

**Figure S1.** Double-layer nesting distribution in the WRF-Chem model, the color bar represents the altitude.

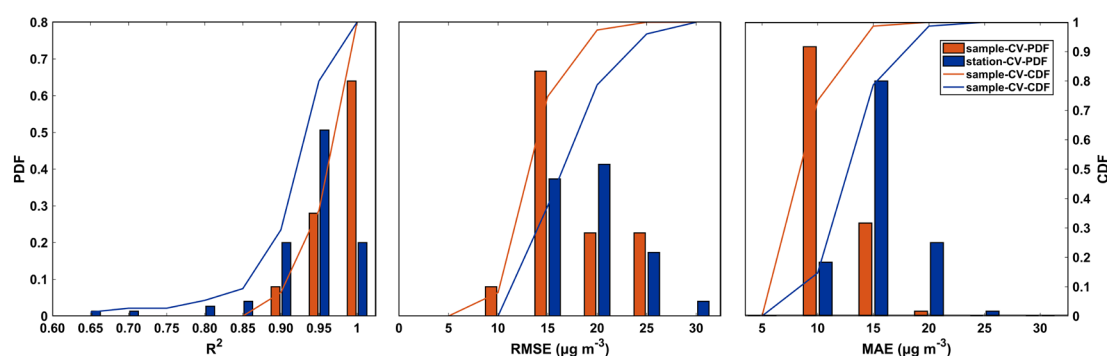

**Figure S2.** Probability density functions (PDFs) and cumulative density functions (CDFs) of the sample-based (red columns) and station-based (blue columns) 10-fold cross-validation.

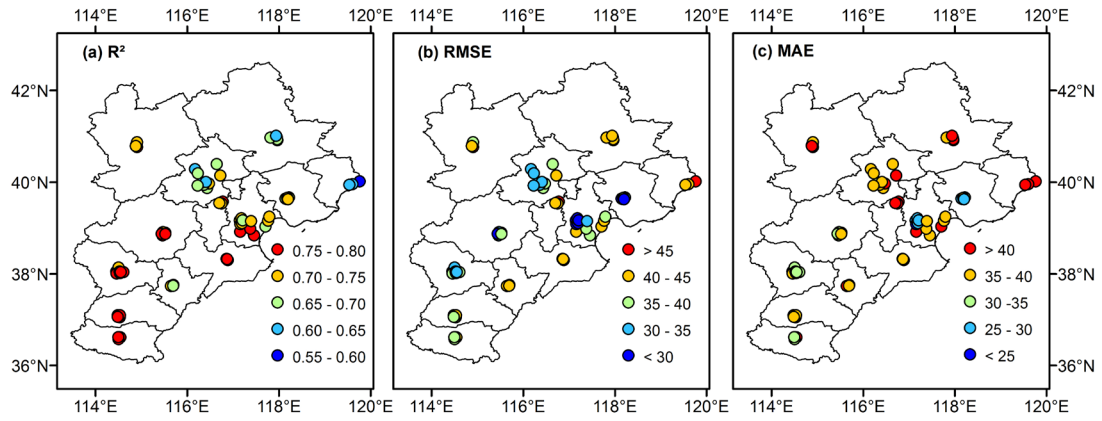

**Figure S3.** The validation results of the WRF-Chem simulations and site observations in the Beijing-Tian-Hebei region in 2018.

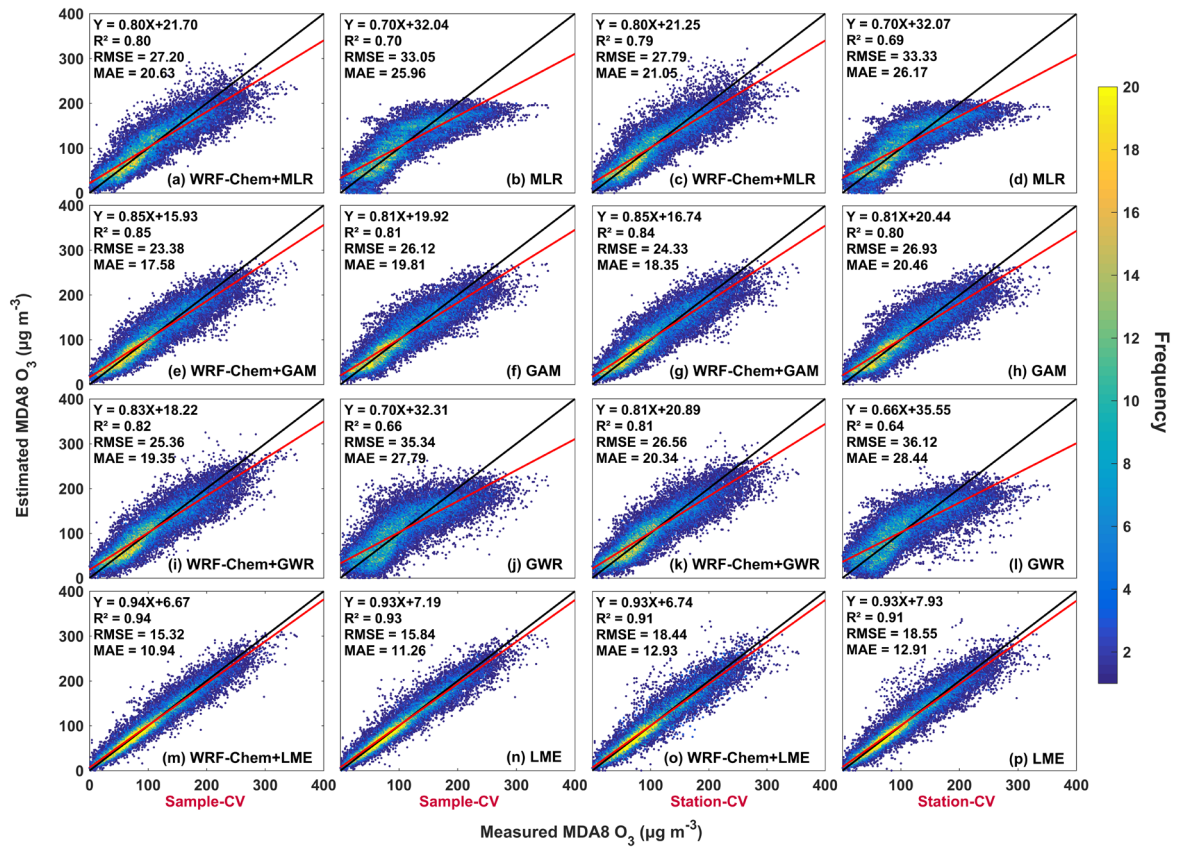

**Figure S4.** The scatter density plot of the final estimation accuracy of different traditional models with and without fusion of the WRF-Chem model.

**Table S1.** Comparison of MDA8 O<sub>3</sub> concentration estimation accuracy between integrating different machine learning algorithms with the WRF-Chem model and the WRFC-XGB model (KNN : K-Nearest Neighbor; SVR: Support Vector Regression; DT : Decision Tree; ET : Extra Tree; RF : Random Forest; GBM: Gradient Boosting Machine).

| Model    | sample-based 10-CV |                                   |                               | station-based 10-CV |                                |                               |
|----------|--------------------|-----------------------------------|-------------------------------|---------------------|--------------------------------|-------------------------------|
|          | R <sup>2</sup>     | RMSE( $\mu$<br>g/m <sup>3</sup> ) | MAE( $\mu$ g/m <sup>3</sup> ) | R <sup>2</sup>      | RMSE( $\mu$ g/m <sup>3</sup> ) | MAE( $\mu$ g/m <sup>3</sup> ) |
| WRFC-KNN | 0.90               | 18.86                             | 12.86                         | 0.85                | 23.57                          | 16.45                         |
| WRFC-SVR | 0.79               | 27.80                             | 20.63                         | 0.77                | 28.80                          | 21.70                         |
| WRFC-DT  | 0.83               | 24.50                             | 18.06                         | 0.82                | 25.62                          | 18.89                         |
| WRFC-ET  | 0.84               | 24.29                             | 17.77                         | 0.82                | 25.98                          | 19.10                         |
| WRFC-RF  | 0.90               | 19.34                             | 14.21                         | 0.88                | 21.11                          | 15.49                         |
| WRFC-GBM | 0.90               | 18.77                             | 13.92                         | 0.88                | 20.65                          | 15.29                         |
| WRFC-XGB | 0.95               | 13.50                             | 9.60                          | 0.91                | 17.70                          | 12.89                         |
